# Supplementary material for: Medicaid Coverage for Methadone Maintenance and Use of Opioid Agonist Therapy in Specialty Addiction Treatment
Source: Atypon-hosted journal article supplement (doi:10.1176/appi.ps.201500228), 2016-02-29
Supplement: appi.ps.201500228.ds001.pdf [file appi.ps.201500228.ds001.pdf]

**This is the appendix to the article “Medicaid Coverage for Methadone Maintenance and Use of Opioid Agonist Therapy in Specialty Addiction Treatment”**

**Appendix Table 1. Characteristics of Medicaid Enrollees in Opioid Use Disorder Treatment in States with No Public Methadone Maintenance Coverage, Coverage by Medicaid, or Coverage by SAPT Block Grant, 2012**

| <b>Characteristics of Medicaid Enrollees Admitted to Treatment</b> | <b>Methadone maintenance covered in Medicaid</b>                           | <b>Methadone maintenance covered by SAPT block grant</b> | <b>No public methadone maintenance coverage</b>                    |
|--------------------------------------------------------------------|----------------------------------------------------------------------------|----------------------------------------------------------|--------------------------------------------------------------------|
| <i>Receives opioid agonist treatment</i>                           | 46.6%                                                                      | 26.3%                                                    | 7.0%                                                               |
| Setting where treatment was received                               |                                                                            |                                                          |                                                                    |
| Residential                                                        | 24.8%                                                                      | 28.1%                                                    | 22.0%                                                              |
| Intensive Outpatient                                               | 16.6%                                                                      | 14.3%                                                    | 16.2%                                                              |
| Non-Intensive Outpatient                                           | 58.6%                                                                      | 57.7%                                                    | 61.7%                                                              |
| Demographics                                                       |                                                                            |                                                          |                                                                    |
| Male                                                               | 46.3%                                                                      | 35.3%                                                    | 25.1%                                                              |
| Hispanic                                                           | 8.0%                                                                       | 5.8%                                                     | 5.0%                                                               |
| non-Hispanic white                                                 | 74.3%                                                                      | 47.4%                                                    | 84.5%                                                              |
| non-Hispanic black                                                 | 14.5%                                                                      | 44.6%                                                    | 6.5%                                                               |
| non-Hispanic other                                                 | 3.3%                                                                       | 2.2%                                                     | 4.0%                                                               |
| Under age 25                                                       | 19.2%                                                                      | 13.6%                                                    | 26.2%                                                              |
| Age 26-35                                                          | 52.9%                                                                      | 37.6%                                                    | 58.5%                                                              |
| Older than 35                                                      | 27.8%                                                                      | 48.9%                                                    | 15.3%                                                              |
| Criminal justice referred                                          | 11.4%                                                                      | 16.2%                                                    | 20.0%                                                              |
| Substance use/treatment history                                    |                                                                            |                                                          |                                                                    |
| First time in treatment                                            | 14.9%                                                                      | 23.8%                                                    | 46.0%                                                              |
| Uses heroin                                                        | 73.5%                                                                      | 75.9%                                                    | 23.8%                                                              |
| Uses prescription opioids                                          | 43.9%                                                                      | 28.1%                                                    | 84.3%                                                              |
| Used daily before treatment                                        | 68.9%                                                                      | 69.0%                                                    | 45.6%                                                              |
| States                                                             | AL, DE, DC, HI,<br>ME, MD, MA,<br>MO, NV, NH,<br>NJ, NM, NC,<br>OR, TX, UT | AK, IL, NE                                               | AR, CO, IN, IA,<br>KS, KY, LA,<br>MT, ND, OK,<br>SC, SD, TN,<br>WY |
| Total number of admissions                                         | 31,519                                                                     | 2,816                                                    | 3,838                                                              |

**Appendix Table 2. Regression Estimates of Differences in Use of Opioid Agonist Therapy by State Groups, With Privately-Insured as Within State Comparison Group, 2012**

| Insurance group and setting | No public<br>methadone<br>maintenance<br>coverage | Methadone<br>maintenance<br>covered in<br>Medicaid | P      | Methadone<br>maintenance<br>covered by SAPT<br>block grant | P      |
|-----------------------------|---------------------------------------------------|----------------------------------------------------|--------|------------------------------------------------------------|--------|
|                             | Estimate % (95% CI)                               | Estimate % (95% CI)                                |        | Estimate % (95% CI)                                        |        |
| All settings                |                                                   |                                                    |        |                                                            |        |
| Medicaid                    | 15.8 (14.4, 17.1)                                 | 42.4 (42.0, 42.9)                                  |        | 27.7 (26.1, 29.2)                                          |        |
| Privately-Insured           | 30.0 (28.6, 31.5)                                 | 29.2 (28.3, 30.1)                                  |        | 28.5 (23.5, 33.6)                                          |        |
| <i>Adjusted Difference</i>  | Ref                                               | 27.5 (25.4, 29.6)                                  | <0.001 | 13.4 (79.0, 19.0)                                          | <0.001 |
| Residential                 |                                                   |                                                    |        |                                                            |        |
| Medicaid                    | 2.7 (0.7, 4.7)                                    | 8.2 (7.5, 8.9)                                     |        | 7.3 (5.2, 9.3)                                             |        |
| Privately-Insured           | 5.0 (2.9, 7.0)                                    | 12.6 (11.3, 13.8)                                  |        | 6.9 (1.8, 12.0)                                            |        |
| <i>Adjusted Difference</i>  | Ref                                               | -2.0 (-5.1, 1.0)                                   | 0.184  | 2.7 (-3.3, 8.7)                                            | 0.379  |
| Intensive outpatient        |                                                   |                                                    |        |                                                            |        |
| Medicaid                    | 7.2 (4.2, 10.2)                                   | 27.2 (26.1, 28.3)                                  |        | 20.6 (16.9, 24.2)                                          |        |
| Privately-Insured           | 6.3 (3.1, 9.6)                                    | 7.1 (5.6, 8.5)                                     |        | 16.4 (1.0, 31.7)                                           |        |
| <i>Adjusted Difference</i>  | Ref                                               | 19.3 (14.7, 23.8)                                  | <0.001 | 3.4 (-12.9, 19.6)                                          | 0.685  |
| Non-intensive outpatient    |                                                   |                                                    |        |                                                            |        |
| Medicaid                    | 26.8 (25.1, 28.4)                                 | 61.0 (60.4, 61.6)                                  |        | 38.0 (35.9, 40.1)                                          |        |
| Privately-Insured           | 49.4 (47.5, 51.3)                                 | 51.9 (50.6, 53.2)                                  |        | 40.8 (33.2, 48.3)                                          |        |
| <i>Adjusted Difference</i>  | Ref                                               | 31.7 (28.9, 34.5)                                  | <0.001 | 19.9 (11.7, 28.0)                                          | <0.001 |

**Notes:**

FFS=fee for service. Adjusted difference is calculated by subtracting predicted probabilities in Medicaid row (Difference 1), subtracting same predicted probabilities in privately-insured row (Difference 2), and then subtracting Difference 1 from Difference 2 (e.g. [42.4- 15.8] - [29.2 - 30.0] = 27.5). Fully adjusted coefficients are expressed as percentage points.
